# Supplementary material for: How to Improve Healthcare for Patients with Multimorbidity and Polypharmacy in Primary Care: A Pragmatic Cluster-Randomized Clinical Trial of the MULTIPAP Intervention
Source: MDPI journal article supplement (doi:10.3390/jpm12050752), 2022-05-06
Supplement: s1 [file s1]

**Supplementary Table S3. Comparison between patients excluded and enrolled.**

|                             | <b>Excluded</b> | <b>Enrolled</b> | <b>P value</b> |
|-----------------------------|-----------------|-----------------|----------------|
|                             | n=42            | n=593           |                |
| <b>Sex</b>                  |                 |                 |                |
| Male                        | 16 (38.1%)      | 262 (44.2%)     | 0.44           |
| Female                      | 26 (61.9%)      | 331 (55.8%)     |                |
| <b>Age, mean (SD)</b>       | 70.7 (2.9)      | 69.7 (2.7)      | <b>0.02</b>    |
| <b>Autonomous Community</b> |                 |                 |                |
| Andalusia                   | 14 (33.3%)      | 199 (33.6%)     | 0.997          |
| Aragon                      | 10 (23.81%)     | 138 (23.3%)     |                |
| Madrid                      | 18 (42.86%)     | 256 (43.2%)     |                |
