# Supplementary material for: How to Improve Healthcare for Patients with Multimorbidity and Polypharmacy in Primary Care: A Pragmatic Cluster-Randomized Clinical Trial of the MULTIPAP Intervention
Source: MDPI journal article supplement (doi:10.3390/jpm12050752), 2022-05-06
Supplement: s1 [file s1]

**Supplementary Table S6. Secondary outcomes at 6 months.**

|                                             | Control group        | Intervention group   | Adjusted difference in means | P value |
|---------------------------------------------|----------------------|----------------------|------------------------------|---------|
|                                             | (N=295)              | (N=298)              |                              |         |
| <b>Use of health services</b> Median ( RIQ) |                      |                      |                              |         |
| Hospital admissions                         | 1 (1-2); n=287       | 1 (1-1); n=287       | -0.098 (-0.644,0.449)        | 0.726   |
| Emergency services                          | 1 (1-2); n=287       | 1 (1-2); n=287       | 0.227 (-0.057,0.512)         | 0.118   |
| Primary-care physician consultations        | 3 (2-6); n=287       | 4 (2-6); n=287       | 0.073 (-0.109,0.256)         | 0.432   |
| Primary-care nurse consultations            | 2 (1-5); n=287       | 3 (2-6); n=287       | 0.168 (-0.081,0.416)         | 0.186   |
| <b>Quality of life</b> mean(SD)             |                      |                      |                              |         |
| EQ-5D-5 L (visual analogue scale)           | 68.5 (17.5); n=287   | 71.0 (18.4); n=285   | 2.21 (-0.72,5.13)            | 0.139   |
| EQ-5D-5 L (index)                           | 0.804 (0.170); n=287 | 0.777 (0.221); n=286 | -0.016 (-0.041,0.010)        | 0.222   |
| <b>Medication safety</b>                    |                      |                      |                              |         |
| Incidence of adverse drug reactions         | 1.0 (1-1); n=285     | 1.0 (1-1); n=287     | 0.49 (-0.30,1.28)            | 0.223   |
| <b>Treatment adherence</b>                  |                      |                      |                              |         |
| Morisky-Green test                          | 75/286 (26.2%)       | 75/287 (26.1%)       | -0.19 (-0.69,0.32)           | 0.467   |
