# Supplementary material for: How to Improve Healthcare for Patients with Multimorbidity and Polypharmacy in Primary Care: A Pragmatic Cluster-Randomized Clinical Trial of the MULTIPAP Intervention
Source: MDPI journal article supplement (doi:10.3390/jpm12050752), 2022-05-06
Supplement: s1 [file s1]

**Supplementary Table S5. Sub-group analyses of the primary outcome at 6-month follow-up (intention-to-treat analysis).**

|                                                        | <b>Control group</b>                   |     | <b>Intervention group</b>              |     |                                |                               |                    |
|--------------------------------------------------------|----------------------------------------|-----|----------------------------------------|-----|--------------------------------|-------------------------------|--------------------|
|                                                        | Unadjusted mean difference in MAI (SD) | N   | Unadjusted mean difference in MAI (SD) | N   | Unadjusted difference in means | Adjusted difference in means* | Interaction term   |
| <b>Age</b>                                             |                                        |     |                                        |     |                                |                               |                    |
| Patients by median age                                 | 1.03 (6.65)                            | 292 | 3.43 (10.24)                           | 297 | -2.4 (-3.8; -1)                | -1.85 (-3.38; -0.32)          | -                  |
| <70 years                                              | 1.36 (6.63)                            | 128 | 2.87 (10.86)                           | 134 | -1.51 (-3.71; 0.7)             | -0.78 (-2.85; 1.29)           |                    |
| ≥70 years                                              | 0.77 (6.68)                            | 164 | 3.89 (9.72)                            | 163 | -3.12 (-4.93; -1.3)            | -2.64 (-4.39; -0.89)          | -1.99 (-4.32;0.34) |
| <b>Number of long-term conditions</b>                  |                                        |     |                                        |     |                                |                               |                    |
| Three                                                  | 1.62 (7.83)                            | 29  | 2.59 (12.54)                           | 41  | -0.96 (-6.22; 4.29)            | 0.2 (-5.07; 5.47)             |                    |
| Four or more                                           | 0.96 (6.52)                            | 263 | 3.56 (9.85)                            | 256 | -2.6 (-4.03; -1.16)            | -1.86 (-3.38; -0.35)          | -0.64 (-4.51;3.23) |
| <b>Drugs Prescribed (Complex Multimorbidity Proxy)</b> |                                        |     |                                        |     |                                |                               |                    |
| < 10 drugs                                             | 1.14 (6.14)                            | 253 | 2.29 (8.24)                            | 230 | -1.14 (-2.44; 0.15)            | -1.15 (-2.52; 0.21)           |                    |
| ≥ 10 drugs                                             | 0.31 (9.38)                            | 39  | 7.34 (14.66)                           | 67  | -7.04 (-12.22; -1.85)          | -3.6 (-8.18; -0.98)           | -3.75 (-6.9;-0.6)  |
| <b>Depression</b>                                      |                                        |     |                                        |     |                                |                               |                    |
| No                                                     | 0.96 (6.99)                            | 214 | 3.59 (10.49)                           | 200 | -2.63 (-4.34; -0.92)           | -2.41 (-4.16; -0.66)          |                    |
| Yes                                                    | 1.23 (5.67)                            | 78  | 3.09 (9.76)                            | 97  | -1.86 (-4.32; 0.6)             | -0.86 (-2.91; 1.2)            | 1.81 (-0.79;4.4)   |
| <b>Arrhythmias</b>                                     |                                        |     |                                        |     |                                |                               |                    |
| No                                                     | 0.89 (5.95)                            | 257 | 3.2 (9.9)                              | 259 | -2.31 (-3.72; -0.9)            | -1.87 (-3.38; -0.35)          |                    |
| Yes                                                    | 2.03 (10.54)                           | 35  | 4.95 (12.39)                           | 38  | -2.92 (-8.31; 2.47)            | -1.58 (-5.16; 2.01)           | -0.28 (-3.8;3.23)  |
| <b>Teaching practice</b>                               |                                        |     |                                        |     |                                |                               |                    |
| No                                                     | 2.53 (10.87)                           | 53  | 8.7 (15.04)                            | 57  | -6.17 (-11.17; -1.18)          | -2.94 (-8.81; 2.93)           |                    |
| Yes                                                    | 0.7 (5.26)                             | 239 | 2.18 (8.29)                            | 240 | -1.48 (-2.72; -0.23)           | -1.5 (-2.84; -0.15)           | 1.95 (-1.99;5.88)  |
| <b>Postgraduate medic trainer</b>                      |                                        |     |                                        |     |                                |                               |                    |
| No                                                     | 1.79 (8.54)                            | 91  | 4.6 (11.54)                            | 121 | -2.8 (-5.64; 0.3)              | -2.09 (-5.22; 1.05)           |                    |
| Yes                                                    | 0.69 (5.58)                            | 201 | 2.63 (9.2)                             | 176 | -1.94 (-3.46; -0.42)           | -1.73 (-3.37; -0.1)           | 0.42 (-2.78;3.62)  |
