# Supplementary material for: How to Improve Healthcare for Patients with Multimorbidity and Polypharmacy in Primary Care: A Pragmatic Cluster-Randomized Clinical Trial of the MULTIPAP Intervention
Source: MDPI journal article supplement (doi:10.3390/jpm12050752), 2022-05-06
Supplement: s1 [file s1]

**Supplementary Table S4. Sensitivity analyses of the primary outcome at 6-month follow-up.**

| <b>Difference in MAI T1-T0 mean (SD)</b>           | <b>Control group<br/>N=295</b> | <b>Intervention group<br/>N=298</b> | <b>Adjusted difference in means (95% CI); p value</b> |
|----------------------------------------------------|--------------------------------|-------------------------------------|-------------------------------------------------------|
| Per-protocol analysis                              | 1.06 (6.75); n=283             | 3.55 (10.4); n=287                  | -2.48(-3.92; -1.04) p=0.001                           |
| Intention-to-treat analysis<br>LOCF                | 1.03 (6.65); n=292             | 3.43 (10.24); n=297                 | -2.39(-3.80; -1.00);<br>p=0.0008                      |
| Intention-to-treat analysis<br>multiple imputation | 1.08 (0.41); n=295             | 3.43 (0.84); n=298                  | -2.42(-4.27; -0.59); p=0.009                          |
